# Supplementary material
Source: PubMed Central journal article supplement (PMC7396301)

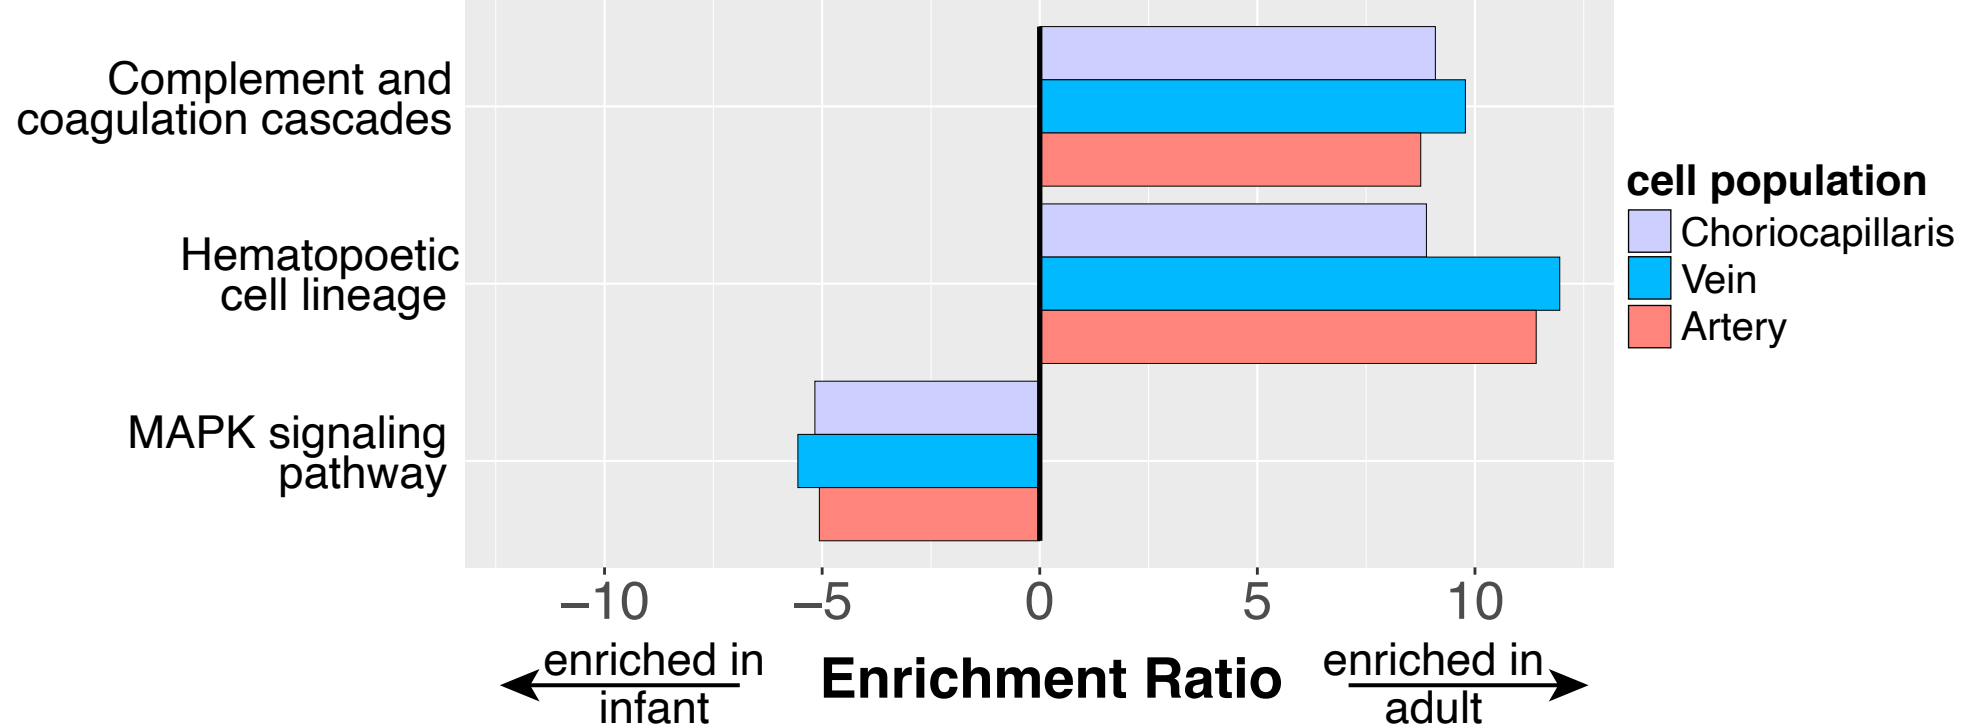

Supplement: NIHMS1607570-supplement-1.pdf [file NIHMS1607570-supplement-1.pdf]
